1 **TITLE PAGE**

2 **Running title**

3 Diagnostic test accuracy in longitudinal study settings: Theoretical approaches with use cases  
4 from clinical practice

5

6 **Full name, department, institution, city, and country of all co-authors**

7 Julia Böhnke<sup>1</sup>, Antonia Zapf<sup>2</sup>, Katharina Kramer<sup>3</sup>, Philipp Weber<sup>2</sup>, ELISE Study Group<sup>4</sup>, André  
8 Karch<sup>1\*</sup>, Nicole Rübsamen<sup>1\*</sup>

- 9 1. Institute of Epidemiology and Social Medicine, University of Münster, Germany, Albert-  
10 Schweitzer-Campus 1, 48149 Münster, Germany
- 11 2. Department of Medical Biometry and Epidemiology, University Medical Center Hamburg-  
12 Eppendorf, Hamburg, Germany
- 13 3. Mathematical Statistics and Artificial Intelligence in Medicine, University of Augsburg,  
14 Augsburg, Germany
- 15 4. ELISE study group members
- 16 Louisa Bode<sup>a</sup>; Marcel Mast<sup>a</sup>; Antje Wulff<sup>a,f</sup>; Michael Marscholke<sup>a</sup>; Sven Schamer<sup>b</sup>;  
17 Henning Rathert<sup>b</sup>; Thomas Jack<sup>b</sup>; Philipp Beerbaum<sup>b</sup>; Nicole Rübsamen<sup>c</sup>; Julia Böhnke<sup>c</sup>;  
18 André Karch<sup>c</sup>; Pronaya Prosun Das<sup>d</sup>; Lena Wiese<sup>d</sup>; Christian Groszweski-Anders<sup>c</sup>; Andreas  
19 Haller<sup>e</sup>; Torsten Frank<sup>e</sup>

20

21 *<sup>a</sup> Peter L. Reichertz Institute for Medical Informatics of TU Braunschweig and Hannover  
22 Medical School, Hannover, Germany*

23 *<sup>b</sup> Department of Pediatric Cardiology and Intensive Care Medicine, Hannover Medical  
24 School, Hannover Germany*

25 <sup>c</sup> *Institute of Epidemiology and Social Medicine, University of Münster, Münster, Germany*

26 <sup>d</sup> *Research Group Bioinformatics, Fraunhofer Institute for Toxicology and Experimental*

27 *Medicine, Hannover, Germany*

28 <sup>e</sup> *medisite GmbH, Hannover, Germany*

29 <sup>f</sup> *Big Data in Medicine, Department of Health Services Research, School of Medicine and*

30 *Health Sciences, Carl von Ossietzky University Oldenburg, Oldenburg, Germany*

31 \* *These authors contributed equally to this work.*

32

33 **ORCID of all authors**

| <b>Author</b>               | <b>ORCID</b>                                                                              |
|-----------------------------|-------------------------------------------------------------------------------------------|
| Julia Böhnke                | <a href="https://orcid.org/0000-0003-1249-4581">https://orcid.org/0000-0003-1249-4581</a> |
| Antonia Zapf                | <a href="https://orcid.org/0000-0002-8467-0508">https://orcid.org/0000-0002-8467-0508</a> |
| Katharina Kramer            | <a href="https://orcid.org/0000-0002-9734-0065">https://orcid.org/0000-0002-9734-0065</a> |
| Philipp Weber               | <a href="https://orcid.org/0000-0002-9520-6284">https://orcid.org/0000-0002-9520-6284</a> |
| André Karch                 | <a href="https://orcid.org/0000-0003-3014-8543">https://orcid.org/0000-0003-3014-8543</a> |
| Nicole Rübsamen             | <a href="https://orcid.org/0000-0003-2198-5577">https://orcid.org/0000-0003-2198-5577</a> |
| Louisa Bode                 | <a href="https://orcid.org/0000-0002-4570-9588">https://orcid.org/0000-0002-4570-9588</a> |
| Marcel Mast                 | <a href="https://orcid.org/0000-0001-6478-2230">https://orcid.org/0000-0001-6478-2230</a> |
| Antje Wulff                 | <a href="https://orcid.org/0000-0002-2550-2627">https://orcid.org/0000-0002-2550-2627</a> |
| Michael Marschollek         | <a href="https://orcid.org/0000-0002-5921-3073">https://orcid.org/0000-0002-5921-3073</a> |
| Sven Schamer                | <a href="https://orcid.org/0000-0003-3626-561X">https://orcid.org/0000-0003-3626-561X</a> |
| Henning Rathert             | <a href="https://orcid.org/0000-0001-9610-0257">https://orcid.org/0000-0001-9610-0257</a> |
| Thomas Jack                 | <a href="https://orcid.org/0000-0003-0576-327X">https://orcid.org/0000-0003-0576-327X</a> |
| Philipp Beerbaum            | <a href="https://orcid.org/0000-0001-9090-0392">https://orcid.org/0000-0001-9090-0392</a> |
| Pronaya Prosun Das          | <a href="https://orcid.org/0000-0003-0165-5167">https://orcid.org/0000-0003-0165-5167</a> |
| Lena Wiese                  | <a href="https://orcid.org/0000-0003-3515-9209">https://orcid.org/0000-0003-3515-9209</a> |
| Christian Groszweski-Anders | ---                                                                                       |
| Andreas Haller              | ---                                                                                       |
| Torsten Frank               | ---                                                                                       |

34

35 **Full name, postal address, e-mail and telephone number of the corresponding authors**

36 Julia Böhnke, MSc

37 Institute of Epidemiology and Social Medicine

38 University of Münster

39 Albert-Schweitzer-Campus 1

40 48149 Münster

41 Germany

42 Phone: +49 251 83 57033

43 Fax: +49 251 83 55300

44 Mail: [boehnkej@uni-muenster.de](mailto:boehnkej@uni-muenster.de)

45 ORCID: 0000-0003-1249-4581

46

47 **Word count**

48 199 of 200 words in Abstract

49 3,942 of 4,000 words in main article (excludes the title page, abstract, table(s), acknowledgments,  
50 contributions and references)

51

52 **Article type**

53 Practice of Epidemiology and Methodology

54 **ABSTRACT**

55 In this study we evaluate how to estimate diagnostic test accuracy (DTA) correctly in the presence  
56 of longitudinal patient data (i.e., repeated test applications per patient). We used a nonparametric  
57 approach to estimate sensitivity and specificity of diagnostic tests for three use cases with different  
58 characteristics (i.e., episode length and intervals between episodes): 1) systemic inflammatory  
59 response syndrome, 2) depression, and 3) epilepsy. DTA was estimated on the levels ‘*time*’,  
60 ‘*event*’, and ‘*patient-time*’ for each diagnosis, representing different research questions. A  
61 comparison of DTA for these levels per and across use cases showed variations in the estimates,  
62 which resulted from the used level, the time unit (i.e., per minute/hour/day), the resulting number  
63 of observations per patient, and the diagnosis-specific characteristics. Researchers need to  
64 predefine their choices (i.e., estimation levels and time units) based on their individual research  
65 aims, including the estimand definitions, and give an appropriate rationale considering the  
66 diagnosis-specific characteristics of the target outcomes and the number of observations per patient  
67 to make sure that unbiased and clinically relevant measures are communicated. Nonetheless,  
68 researchers could report the DTA of the test using more than one estimation level and/or time unit  
69 if this still complies with the research aim.

70

71 **KEYWORDS**

72 Diagnostic study, diagnostic test accuracy, longitudinal study, data cluster, nonparametric method,  
73 estimation level

74 **1. INTRODUCTION**

75 A diagnostic test (DT) can be any device (e.g., biomarker quantification of bodily fluids, magnetic  
76 resonance imaging, or clinical decision support system [CDSS])<sup>1-3</sup> with which healthcare  
77 professionals can classify a target condition (e.g., diseased vs disease-free)<sup>1-6</sup> and make an  
78 informed decision based on the test's result. Each test requires to be assessed for its diagnostic  
79 accuracy (i.e., sensitivity and specificity) before its usage in daily practice within medical settings<sup>7</sup>.  
80 Ideally, a DT should provide a correct classification of the target condition (i.e., *true positives* [TP],  
81 *true negatives* [TN], Appendix 1) while being safe and effective in its diagnostic performance<sup>2,3,5</sup>;  
82 thus, the quantity of *false positive* (FP) and *false negative* (FN) test results should be minimal<sup>5</sup>.  
83 Misdiagnoses can have serious consequences for the patient's health<sup>2,5</sup>, including mental distress<sup>7</sup>,  
84 and/or for a country's healthcare system (e.g., unnecessary costs)<sup>2</sup>.

85  
86 The diagnostic validity of the DT (referred to as *index test*, IT) is best assessed in a diagnostic test  
87 accuracy (DTA) study using an established, carefully selected *reference standard* (RS) as the  
88 ground truth<sup>5,7</sup>. To minimize potential influences, both tests should be blinded to each other, and  
89 performed without time delay to avoid diagnostic differences caused by temporal changes in the  
90 target condition<sup>2,5</sup>. Conducting the evaluation of a DT with a DTA study provides healthcare  
91 professionals with the necessary information on the DT's performance so that they can make an  
92 informed decision<sup>5</sup>. Information on test performance is usually reported in terms of sensitivity and  
93 specificity (Appendix 1 for key terminology of DTA studies).

94  
95 Lately, researchers showed that many DTA studies are of low quality, do not necessarily represent  
96 the clinical situation of interest, and/or are associated with a considerable risk of bias<sup>8,9</sup>. As a  
97 consequence, the DT under review might not be used in practice, or the research may be

98 involuntarily distorted and most likely overoptimistic about the IT's performance<sup>9,10</sup>. Particularly,  
99 repeated measurements per patient (see Appendix 2 for examples) require adequate DTA  
100 assessment as the within-person correlation can inflate the DT's uncorrected accuracy compared  
101 to only including a single measurement per patient in the DTA estimation<sup>11-13</sup>. A systematic review  
102 on studies evaluating the DTA of CDSS highlighted that most DTA studies did not report sufficient  
103 information on the usage of or adjustment for longitudinal data (i.e., repeated measurements per  
104 patients with disease-free and/or diseased periods) in the DTA estimation<sup>8</sup>. The DTA studies that  
105 accounted for longitudinal data used various methods to adjust their DTA estimates<sup>14</sup>.

106  
107 Treatment effects must also be considered: An early intervention may hinder the onset of the target  
108 condition while treatment after diagnosis may cause a health improvement so that the diagnostic  
109 status may change from diseased to disease-free. An a priori definition of the estimand that is the  
110 target of estimation to address the scientific question of interest posed by the study objective<sup>15-18</sup>  
111 is, therefore, necessary.

112  
113 This study systematically evaluates how to analyze and report longitudinal data from DTA studies  
114 using datasets on systematic inflammatory response syndrome (SIRS), depression, and epilepsy as  
115 use cases. The longitudinal data challenge will be addressed by:

- 116 - presenting three DTA estimation levels (i.e., time-level, event-level, and patient-time-level)  
117 and their respective DTA estimations, and
- 118 - introducing a nonparametric method based on research by Konietschke & Brunner<sup>19</sup> and  
119 Lange<sup>11</sup>.

120 Note that other methods of DTA estimation accounting for longitudinal data<sup>10</sup> are available (not  
121 addressed in this paper); regardless, the approaches of this article (choice of time unit and  
122 estimation level) apply.

123

## 124 **2. METHODS**

125 This study is reported in accordance with the items of the 2015 Standard for Reporting Diagnostic  
126 Accuracy guideline<sup>20</sup> (Appendix 3). In the following, we use the following nomenclature: A “time  
127 unit” is chosen by the researcher, i.e. the diagnostic status is assessed every minute/hour/day etc.  
128 A “time point” refers to a specific minute/hour/day within the longitudinal setting, e.g. hour 24 of  
129 a patient’s stay. A “block” is an aggregation of labeled time points based on the rules explained  
130 below.

131

### 132 **2.1 DTA estimation levels**

133 We present three DTA estimation levels (Figure 1 and Appendix 4) determining an IT’s  
134 performance using longitudinal patient data.

135

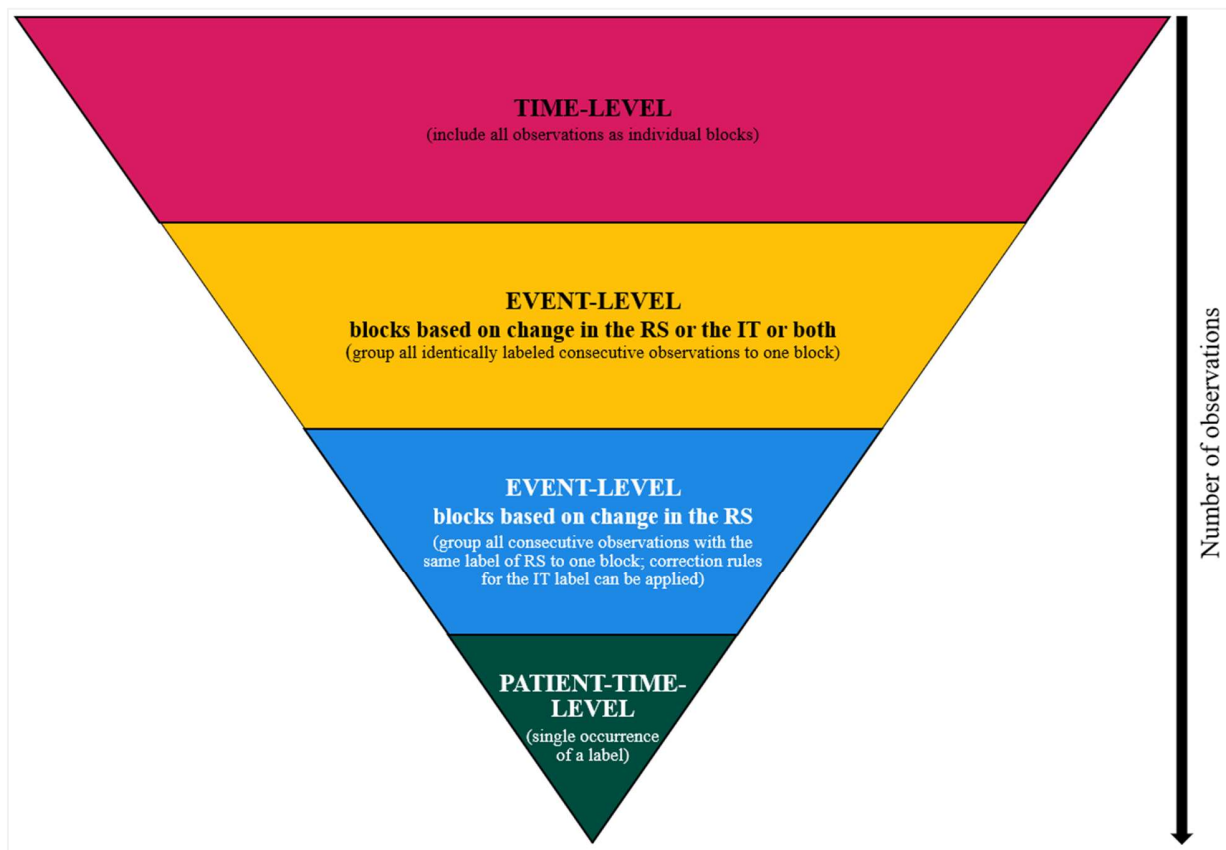

136

137 **Figure 1:** Visualization of the data structure and its subunits that are included in the diagnostic test  
138 accuracy estimation. Two options for the event-level are presented that differ regarding their  
139 groupings of labeled time points into blocks.

140

### 141 2.1.1 Time-level

142 The time-level provides labels (i.e., TP, TN, FP, or FN) for every time point. This level's estimand  
143 is the diagnostic status per time point without any aggregation.

144

### 145 2.1.2 Event-level

146 The event-level aggregates consecutive, labeled time points based on diagnostic status; thus, per  
147 patient, the minimum block length is one time unit and the maximum block length is equivalent to



148 the total of all time points (i.e., no change in diagnostic status). This level requires that the estimand  
149 is a change in the diagnostic status.

150 In the following, we differentiate between blocks based on the RS alone, or on both, the IT and the  
151 RS.

#### 152 *2.1.2.1 Blocks based on RS*

153 The time point where the RS changes its diagnostic status determines the end of the previous block  
154 and the start of the new block. With this definition, the result of the RS is assumed to be known  
155 while the result of the IT is a random variable that follows a Bernoulli distribution.

156 For DTA estimation, the time point labels per block are summarized into one single label. FP and  
157 FN labels always overrule TP and TN labels as they indicate differences between the tests. The  
158 summarized block labels are used in the DTA estimation. This labeling penalizes any differences  
159 (i.e., early/late episode start/end, etc.) between the DTs by having an increase of FP and FN labels.

160 We can control for this by applying modifying rules, for example with applying a clinician-based  
161 tolerance margin rule so that if the IT starts/ends within the tolerance margin of the RS, the IT's  
162 diagnostic status of the specific time points is changed in accordance with the RS's diagnostic  
163 status (i.e., no "punishment" if IT starts/ends too early/late). However, if the IT starts/ends outside  
164 of the tolerance margin, the IT's diagnostic status of these specific time points remains unchanged.

165 A %-correctness rule can also be applied according to which the IT's diagnostic status per patient  
166 is corrected in accordance with the RS's diagnostic status if at minimum  $P_{diseased}$  percent of single  
167 time points per a diseased block and at minimum  $P_{disease-free}$  percent of single time points per a  
168 disease-free block are correctly classified. The  $P$ 's are diagnosis-specific. For our analysis, we used  
169 a  $\pm 1$  time interval tolerance margin around the RS's episode start and end and an 85% correction  
170 rule for diseased and disease-free blocks (see Appendix 5 for analyses using other modifying rules).

171 Afterwards, the labels are summarized into a single label and used for the DTA estimation.

172            *2.1.2.2 Blocks based on IT and RS*

173    At first, each time point is labeled and then all consecutive time points with an identical label are  
174    grouped together into blocks. Each new block starts and ends with a change of the diagnostic status  
175    of the IT and/or the RS. Afterwards, each block is given a single summary label that is used for the  
176    DTA estimation. Modifying rules can be applied. With this definition, both the result of the RS and  
177    the results of the IT are random variables, which violates one assumption of our proposed  
178    nonparametric approach.

179

180            **2.1.3 Patient-time-level**

181    The patient-time-level summarizes the occurrence of all labels per patient during the defined  
182    period; thus, a patient adds at minimum one label (i.e., either TP, FP, FN, or TN) or at maximum  
183    all four labels once to the DTA estimation. This level's estimand is the occurrence of the different  
184    possible labels, without considering their respective frequency. It is not suited for usage because  
185    with time the probability of observing all four labels increases; hence, this level, at best, is a biased  
186    estimate of 50% sensitivity and 50% specificity.

187

188            **2.1.4 Example of labeling per estimation level**

189    An example of labeling of the three levels is displayed in Figure 2. Each crossed out cell marks the  
190    presence of the target condition according to the respective test at that particular time point. Below  
191    are the labeled units per level, as described previously, which are used for the DTA estimation. The  
192    event-level with blocks based on IT and RS as well as the patient-time-level are shown for  
193    illustration only; they should not be used in clinical practice.

194

| Time points                                           | 0  | 1  | 2  | 3  | 4  | 5  | 6  | 7  | 8  | 9  | 10 | 11 | 12 | 13 | 14 | 15 | 16 | 17 | 18 | 19 | 20 | 21 | 22 | 23 | 24 |
|-------------------------------------------------------|----|----|----|----|----|----|----|----|----|----|----|----|----|----|----|----|----|----|----|----|----|----|----|----|----|
| Reference standard                                    |    |    | X  | X  | X  | X  | X  | X  | X  | X  | X  | X  | X  | X  | X  | X  | X  | X  | X  | X  | X  | X  | X  | X  | X  |
| Index test                                            |    | X  | X  |    |    |    |    |    |    |    |    |    |    |    |    |    |    |    |    |    |    | X  | X  | X  |    |
| Time-level                                            | TN | FP | TP | TP | TP | TP | TP | TP | TP | TP | FN | FN | TP | TP | TP | TP | TP | TP | TP | TP | TP | TP | FP | FP | TN |
| Event-level<br>(blocks based on RS)<br>- unmodified - | FP |    | FN |    |    |    |    |    |    |    |    |    |    |    |    |    |    |    |    |    | FP |    |    |    |    |
| Event-level<br>(blocks based on RS)<br>- modified -   | TN |    | TP |    |    |    |    |    |    |    |    |    |    |    |    |    |    |    |    |    | FP |    |    |    |    |
| Event-level<br>(blocks based on IT<br>and RS)         | TN | FP | TP |    |    |    |    |    |    |    | FN |    | TP |    |    |    |    |    |    |    | FP | TN |    |    |    |
| Patient-time-level                                    | TN | FP | TP |    |    |    |    |    |    |    | FN |    |    |    |    |    |    |    |    |    |    |    |    |    |    |

Diagnostic test accuracy labeling using the various estimation levels. Each label per estimation level is included in the diagnostic test accuracy estimation.

- Time-level:** Each individual time point is labeled by comparing the reference standard diagnostic status to the index test diagnostic status.
- Event-level (blocks based on reference standard):** The time points where the reference standard changes its diagnostic status determined the end of the previous block and the start of the new block; thus, the result of the reference standard is assumed to be not influenced by chance while the result of the index test is a random variable that follows a Bernoulli distribution. For the unmodified version, the individual labeled time points per block are summarized to one single label (i.e., FN and FP labels are always overruling TP and TN labels). For the modified version, a tolerance margin of  $\pm 1$  time point at the start and end of diseased reference standard block (see grey boxes at time points 1-2 and 21-22 of the index test) and an 85% correctness rule (see blue box at time points 10-11 of the index test) per block (here: diseased and disease-free blocks) is applied according to which the index test is modified. Afterwards, the labeled time points per block are summarized to one single label.
- Event level (blocks based on index test and reference standard):** All labeled, consecutive time points with an identical diagnostic label are group together into blocks. Each new block starts and ends with a change of the diagnostic status of the index test and/or the reference standard. Afterwards, each block is given a single summary label. ATTENTION: This level is not suited for usage since it violates one assumption of our proposed nonparametric approach!
- Patient-time-level:** Each single occurrence of a label is only once included in the diagnostic test accuracy estimation; hence, the frequency of labels is ignored. ATTENTION: This level is not suited for usage because with time the likelihood of observing all four labels increases; hence, this level, at best, is a biased estimate of 50% sensitivity and 50% specificity.

195

196 **Figure 2:** Example of labeling on the three levels. The time-level adds 18 true positive (TP), 3 false

197 positive (FP), 2 false negative (FN), and 2 true negative (TN) observations to the DTA estimation.

198 The DTA estimation of the event-level using blocks based on RS adds 1 TP, 1 FP, and 1 TN to the

199 DTA estimation while the event level using blocks based on both tests adds 2 TP, 2 FP, 1 FN, and

200 2 TN observations. On the patient-time-level, all four labels were observed; thus, this patient adds

201 one observation to each label.

202

203 **2.2 The nonparametric approach**

204 The DTA can be estimated using the nonparametric approach based on research by Konietschke &

205 Brunner<sup>19</sup> and Lange<sup>11</sup> which is robust and reliable even when accounting for intra- and interclass

206 correlations<sup>21</sup>. Konietschke & Brunner<sup>19,21</sup> proposed a categorization of participants into three

207 cluster groups, regardless of the individual participant's number of repeated measurements:

- 208 - ‘Absent’ ( $ic_0$ ): incomplete cases with target condition consistently absent (i.e., patient was  
209 consistently disease-free during the total observation period; these cases are “incomplete”  
210 because diseased phases are missing).
- 211 - ‘Present’ ( $ic_1$ ): incomplete cases with target condition consistently present (i.e., patient was  
212 consistently diseased during the total observation period; these cases are “incomplete”  
213 because disease-free phases are missing).
- 214 - ‘Mix’ ( $c$ ): complete cases with target condition both present and absent (i.e., the patient  
215 experienced diseased and disease-free phases during the total observation period).

216 In the DTA estimation, this method uses a unified nonparametric model to estimate the area under  
217 the curve, sensitivity, and specificity accounting for a longitudinal data format<sup>11,22</sup>. This approach  
218 applies a nonparametric rank statistic while accounting for the clustering by using the weighted  
219 estimation strategy (i.e., weighting by size of the clusters; thus, larger clusters have larger weights  
220 than smaller ones)<sup>11,21</sup>. This allows assigning an equal weight to all subunits of the same cluster<sup>21</sup>.  
221 Each DTA estimate is presented with its 95% logit Wald confidence interval (CI). For details on  
222 the method, we refer to <sup>11,19</sup>. The R code for the analyses is provided at [https://zivgitlab.uni-](https://zivgitlab.uni-muenster.de/ruebsame/dta_longitudinal_data_methods)  
223 [muenster.de/ruebsame/dta\\_longitudinal\\_data\\_methods](https://zivgitlab.uni-muenster.de/ruebsame/dta_longitudinal_data_methods).

224

225 **2.3 The datasets**

226 We used three publicly available datasets to show the application of our proposed methods across  
227 different medical fields. Dataset descriptions, dataset labeling, and information on ITs and RSs are  
228 presented in Appendix 5.

229

### 230           **2.3.1 SIRS dataset**

231   The SIRS dataset includes 168 male and female pediatric patients (0-17 years). All participants  
232   were consecutively recruited at a single study center (i.e., Department of Pediatric Cardiology and  
233   Pediatric Intensive Care at Hannover Medical School, Germany) between 2018-08-01 and 2019-  
234   03-31. A total of 101 of the 168 patients developed at least one SIRS episode at any time during  
235   their inpatient stay at the study center. For details, we refer to <sup>23-25</sup>. We used the data of 36 patients  
236   (26 diseased individuals) to ensure comparability with the other datasets regarding the sample size.

237

### 238           **2.3.2 Depression dataset**

239   The depression dataset includes records of 55 adult patients of which 23 experienced a depressive  
240   episode (5 inpatients and 18 outpatients) and 32 individuals did not (23 hospital employees, 5  
241   students, and 4 former, currently non-depressive, patients). All individuals were recruited while  
242   being treated at the Department of Psychiatry of the Haukeland University, Norway. The  
243   depressive patients were equipped with a wearable sensor that recorded the patients' motor activity  
244   per minute since depressive people tend to decrease their personal activity (i.e., reduced active  
245   during day-time hours). In total, activity data from 693 days were recorded (diseased: 291 days;  
246   controls: 402 days)<sup>26</sup>. For this study's purpose, the dataset included all cases and only the first 10  
247   controls (33 patients in total).

248

### 249           **2.3.3 Epilepsy dataset**

250   The epilepsy dataset entails electroencephalogram (EEG) recordings of 22 pediatric and young  
251   adult patients (5 males, 3-22 years; 17 females, 1.5-19 years; ID chb01 and chb21 are from the  
252   same person) with intractable seizures of the Boston Children's Hospital, USA. One extra patient  
253   was added later. Each patient was likely to develop an epileptic episode due to having stopped the

254 anti-seizure medication under medical supervision in an inpatient setting. A total of 197 episodes  
255 were recorded (i.e., each patient had  $\geq 2$  episodes). EEG-signals were recorded at a frequency of  
256 256 samples per second with 16-bit resolution<sup>27</sup>. Modifications were applied to the dataset to meet  
257 this study's research purpose: Six additional disease-free synthetic patient records were added to  
258 have a sample size of 30 patients.

259

## 260 **2.4 Analysis**

261 The assessment of the datasets by the ITs and RSs (Appendix 4 and 5) was consistently applied to  
262 the (modified) datasets. Missing values of the IT's and RS's assessments were not observed.  
263 Indeterminate test results were not registered.

264 Sensitivities and specificities were estimated for each diagnosis per time unit (i.e., minute, hour,  
265 and day) and per estimation level (i.e., time-level, event-level, and patient-time-level) using the  
266 nonparametric approach<sup>11,19</sup>. All analyses were conducted using R version 4.2.3 (2023-03-15)<sup>28</sup>.

267 The DTA estimation package is accessible via <https://github.com/wbr-p/diagacc>.

268

## 269 **3. RESULTS**

### 270 **3.1 Study participants**

271 The SIRS, depression, and epilepsy datasets included 36 (10 disease-free individuals), 33 (10  
272 disease-free individuals), and 30 participants (6 disease-free individuals), respectively. For details  
273 on the participant's flow per diagnosis and demographic characteristics, see Appendix 6 and 7.

274

### 275 **3.2 Test results per use case (intra-study evaluation)**

276 We observed relevant differences within and across the different use cases for the three levels and  
277 time units (Figure 3 and Table 1).

278

### 279 **3.2.1 SIRS**

280 The DTA evaluation for the different time units estimated sensitivities of 84.8-93.6% on the time-  
281 level, of 43.5-86.4% without modifying rules and 71.7-93.2% with modifying rules on the event-  
282 level with blocks based on RS, of 62.0-86.3% on the event-level with blocks based on IT and RS,  
283 and of 58.0-82.9% on the patient-time-level. Specificities of 94.4-97.6% on the time-level, of 68.1-  
284 82.5% on the event-level without modifying rules and 90.5-97.6% with modifying rules on the  
285 event-level with blocks based on RS, of 75.4-83.7% with blocks based on IT and RS, and of 71.6-  
286 81.1% on the patient-time-level were estimated.

287

### 288 **3.2.2 Depression**

289 The DTA assessment for the different time units estimated sensitivities and specificities that were  
290 ranging from 93.6% to 93.9% and from 97.5% to 98.3% on the time-level, respectively. On the  
291 event-level with blocks based on RS, the unmodified sensitivity was 79.3% for all time units and  
292 the unmodified specificities ranged between 29.0-98.4%, while the modified DTA estimated an  
293 86.2% sensitivity for all time units and specificities of 69.4-98.4%. The DTA of the event-level  
294 with blocks based on IT and RS estimated sensitivities of 80.6% for all time units and specificities  
295 of 58.9-98.4%. On the patient-time-level, the sensitivity was 78.6% irrespective of the used time  
296 unit, while the specificities ranged between 60.0% and 97.1%.

297

### 298 **3.2.3 Epilepsy**

299 The use case epilepsy estimated sensitivity and specificity of 80.5-98.7% and 98.1-98.5% on the  
300 time-level, respectively. Sensitivities of 73.4-96.9% and specificities of 67.3-96.0% were estimated  
301 on the event-level with blocks based on RS without modifying rules, while sensitivities of 71.7-

302 93.2% and specificities of 90.5-97.6% were estimated on the event-level with blocks based on RS  
303 after applying modifying rules. On the event-level with blocks based on IT and RS, DTA ranges  
304 of 74.2-97.1% sensitivities and 76.6-96.0% specificities were estimated, while sensitivities and  
305 specificities ranged between 55.8% and 96.0% and 58.8% and 95.0%, respectively, on the patient-  
306 time-level.

307

### 308 **3.3 Test results across use cases (inter-study evaluation)**

309 The evaluation across use cases showed that the highest DTAs, irrespective of used time unit and/or  
310 diagnosis, were estimated on the time-level, while the DTA on the event-level and patient-time-  
311 level were lower. The event-level with blocks based on RS showed that the unmodified DTA  
312 estimates were decreased compared to the DTA estimates after IT correction which sensitively  
313 depend on the chosen tolerance margin and/or %-correction rule. Moreover, the DTA estimates  
314 using ‘days’ as a time unit were closer to 100% than the DTA estimates using ‘hours’ or ‘minutes’  
315 as time units. The number of observations decreased dramatically from the time-level to the event-  
316 level and/or patient-time-level which is somewhat mirrored by the DTA estimates.

317



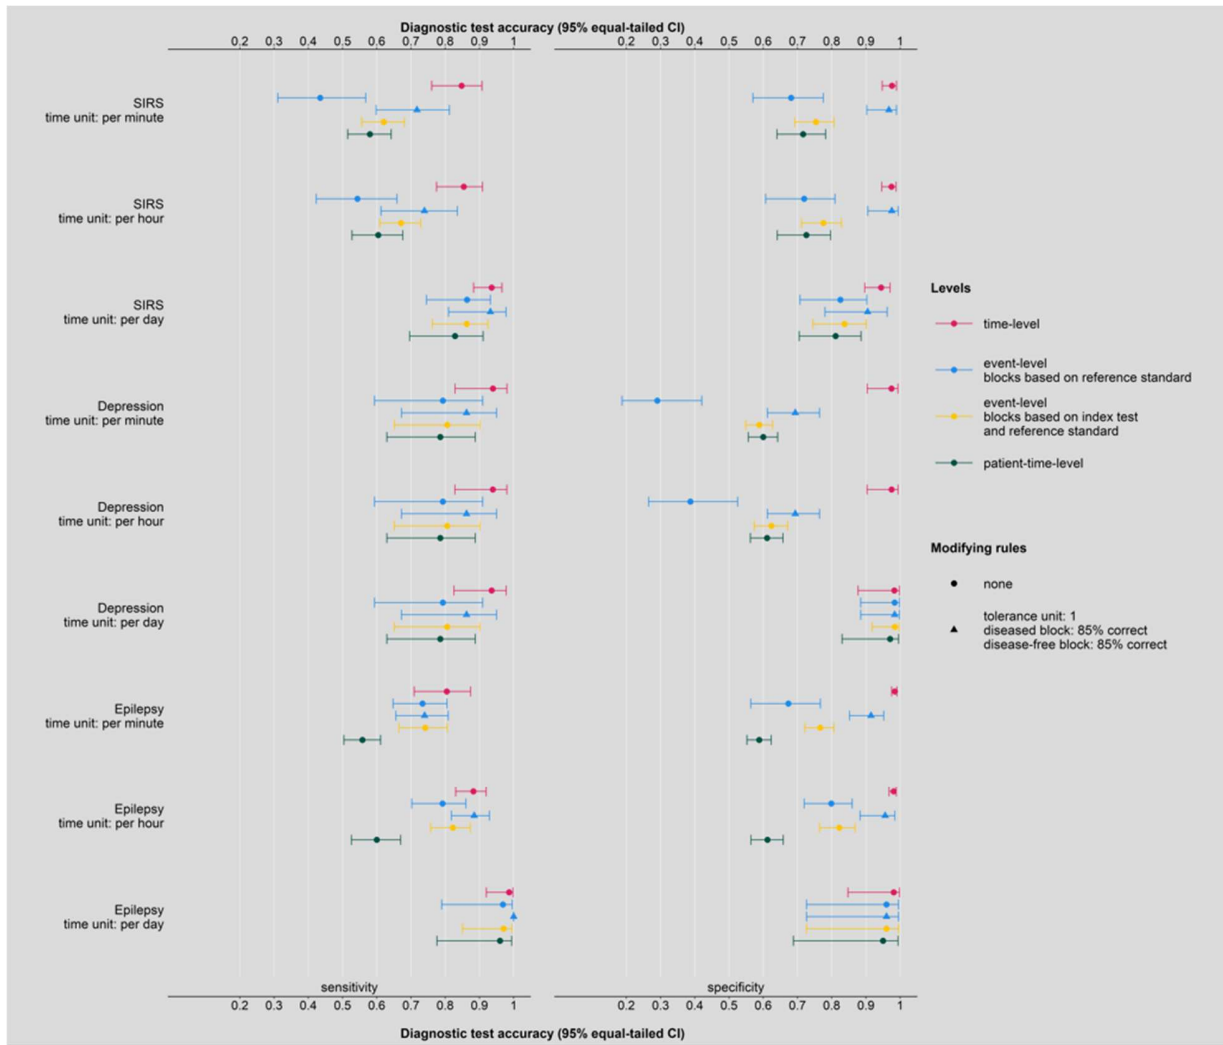

318

319 **Figure 3:** Summary of the diagnostic test accuracy of all three diagnoses stratified by the diagnostic  
 320 test accuracy indices (i.e., sensitivity and specificity), by the estimation level (i.e., time-level,  
 321 event-level, and patient-time-level), and by the time unit (i.e., minute, hour, and day).

| Diagnosis                                      | Time unit | Level                                      | Sensitivity (95% CI)  | Specificity (95% CI)  | True Positive | False Positive | False Negative | True Negative |
|------------------------------------------------|-----------|--------------------------------------------|-----------------------|-----------------------|---------------|----------------|----------------|---------------|
| Systemic Inflammatory Response Syndrome (SIRS) | Minute    | Time                                       | 84.8%<br>(76.1-90.7%) | 97.6%<br>(94.8-98.9%) | 84,243        | 12,315         | 15,124         | 500,847       |
|                                                |           | Event <sup>1</sup><br>(blocks based on RS) | 43.5%<br>(31.1-56.8%) | 68.1%<br>(57.0-77.5%) | 20            | 29             | 26             | 62            |
|                                                |           | Event <sup>2</sup><br>(blocks based on RS) | 71.7%<br>(59.8-81.2%) | 96.7%<br>(90.2-98.9%) | 33            | 3              | 19             | 88            |
|                                                |           | Event<br>(blocks based on IT and RS)       | 62.0%<br>(55.6-68.1%) | 75.4%<br>(69.2-80.6%) | 49            | 33             | 30             | 101           |
|                                                |           | Patient-time                               | 58.0%<br>(51.5-64.2%) | 71.6%<br>(64.0-78.2%) | 29            | 19             | 21             | 48            |
|                                                | Hour      | Time                                       | 85.4%<br>(77.5-90.9%) | 97.5%<br>(94.6-98.8%) | 1,454         | 216            | 248            | 8,315         |
|                                                |           | Event <sup>1</sup><br>(blocks based on RS) | 54.3%<br>(42.3-65.9%) | 72.0%<br>(60.7-81.0%) | 25            | 23             | 21             | 59            |
|                                                |           | Event <sup>2</sup><br>(blocks based on RS) | 73.9%<br>(61.2-83.6%) | 97.6%<br>(90.6-99.4%) | 34            | 2              | 12             | 80            |
|                                                |           | Event<br>(blocks based on IT and RS)       | 67.1%<br>(60.9-72.8%) | 77.6%<br>(71.2-82.9%) | 49            | 26             | 24             | 90            |
|                                                |           | Patient-time                               | 60.4%<br>(52.8-67.6%) | 72.6%<br>(64.1-79.7%) | 29            | 17             | 19             | 45            |
|                                                | Day       | Time                                       | 93.6%<br>(88.3-96.6%) | 94.4%<br>(89.7-97.1%) | 102           | 19             | 7              | 321           |
|                                                |           | Event <sup>1</sup><br>(blocks based on RS) | 86.4%<br>(74.5-93.2%) | 82.5%<br>(70.7-90.2%) | 38            | 11             | 6              | 52            |
|                                                |           | Event <sup>2</sup><br>(blocks based on RS) | 93.2%<br>(81.0-97.8%) | 90.5%<br>(78.0-96.2%) | 41            | 6              | 3              | 57            |
|                                                |           | Event<br>(blocks based on IT and RS)       | 86.3%<br>(76.3-92.5%) | 83.7%<br>(74.5-90.1%) | 44            | 13             | 7              | 67            |
|                                                |           | Patient-time                               | 82.9%<br>(69.6-91.1%) | 81.1%<br>(70.5-88.6%) | 29            | 10             | 6              | 43            |

| Diagnosis  | Time unit | Level                                      | Sensitivity (95% CI)  | Specificity (95% CI)  | True Positive | False Positive | False Negative | True Negative |
|------------|-----------|--------------------------------------------|-----------------------|-----------------------|---------------|----------------|----------------|---------------|
| Depression | Minute    | Time                                       | 93.9%<br>(82.9-98.0%) | 97.5%<br>(90.4-99.4%) | 728,122       | 75,338         | 46,926         | 2,886,594     |
|            |           | Event <sup>1</sup><br>(blocks based on RS) | 79.3%<br>(59.4-91.0%) | 29.0%<br>(18.7-42.0%) | 23            | 44             | 6              | 18            |
|            |           | Event <sup>2</sup><br>(blocks based on RS) | 86.2%<br>(67.2-95.0%) | 69.4%<br>(61.2-76.4%) | 25            | 19             | 4              | 43            |
|            |           | Event<br>(blocks based on IT and RS)       | 80.6%<br>(65.1-90.2%) | 58.9%<br>(54.9-62.7%) | 29            | 44             | 7              | 63            |
|            |           | Patient-time                               | 78.6%<br>(63.0-88.8%) | 60.0%<br>(55.6-64.2%) | 22            | 22             | 6              | 33            |
|            | Hour      | Time                                       | 93.9%<br>(82.8-98.0%) | 97.5%<br>(90.3-99.4%) | 12,159        | 1,232          | 788            | 48,104        |
|            |           | Event <sup>1</sup><br>(blocks based on RS) | 79.3%<br>(59.4-91.0%) | 38.7%<br>(26.5-52.5%) | 23            | 38             | 6              | 24            |
|            |           | Event <sup>2</sup><br>(blocks based on RS) | 86.2%<br>(67.2-95.0%) | 69.4%<br>(61.2-76.4%) | 25            | 19             | 4              | 43            |
|            |           | Event<br>(blocks based on IT and RS)       | 80.6%<br>(65.1-90.2%) | 62.4%<br>(57.4-67.1%) | 29            | 38             | 7              | 63            |
|            |           | Patient-time                               | 78.6%<br>(63.0-88.8%) | 61.1%<br>(56.2-65.8%) | 22            | 21             | 6              | 33            |
|            | Day       | Time                                       | 93.6%<br>(82.5-97.8%) | 98.3%<br>(87.7-99.8%) | 523           | 35             | 36             | 2,045         |
|            |           | Event <sup>1</sup><br>(blocks based on RS) | 79.3%<br>(59.4-91.0%) | 98.4%<br>(88.5-99.8%) | 23            | 1              | 6              | 61            |
|            |           | Event <sup>2</sup><br>(blocks based on RS) | 86.2%<br>(67.2-95.0%) | 98.4%<br>(88.5-99.8%) | 25            | 1              | 4              | 61            |
|            |           | Event<br>(blocks based on IT and RS)       | 80.6%<br>(65.1-90.2%) | 98.4%<br>(91.8-99.7%) | 29            | 1              | 7              | 63            |
|            |           | Patient-time                               | 78.6%<br>(63.0-88.8%) | 97.1%<br>(83.0-99.6%) | 22            | 1              | 6              | 33            |

| Diagnosis | Time unit                                  | Level                                      | Sensitivity (95% CI)                       | Specificity (95% CI)  | True Positive         | False Positive | False Negative | True Negative |
|-----------|--------------------------------------------|--------------------------------------------|--------------------------------------------|-----------------------|-----------------------|----------------|----------------|---------------|
| Epilepsy  | Minute                                     | Time                                       | 80.5%<br>(70.9-87.4%)                      | 98.5%<br>(97.5-99.0%) | 8,485                 | 2,409          | 2,061          | 153,075       |
|           |                                            | Event <sup>1</sup><br>(blocks based on RS) | 73.4%<br>(64.8-80.5%)                      | 67.3%<br>(56.4-76.7%) | 124                   | 65             | 45             | 134           |
|           |                                            | Event <sup>2</sup><br>(blocks based on RS) | 74.0%<br>(65.6-80.9%)                      | 91.5%<br>(85.2-95.2%) | 125                   | 17             | 44             | 182           |
|           |                                            | Event<br>(blocks based on IT and RS)       | 74.2%<br>(66.5-80.6%)                      | 76.6%<br>(72.2-80.6%) | 132                   | 71             | 46             | 233           |
|           |                                            | Patient-time                               | 55.8%<br>(50.4-61.1%)                      | 58.8%<br>(55.2-62.3%) | 24                    | 21             | 19             | 30            |
|           |                                            | Time                                       | 88.2%<br>(83.1-91.9%)                      | 98.1%<br>(96.8-98.9%) | 277                   | 47             | 37             | 2,422         |
|           | Hour                                       | Event <sup>1</sup><br>(blocks based on RS) | 79.2%<br>(70.2-86.1%)                      | 79.9%<br>(72.0-86.1%) | 103                   | 32             | 27             | 127           |
|           |                                            | Event <sup>2</sup><br>(blocks based on RS) | 88.5%<br>(81.8-92.9%)                      | 95.6%<br>(88.3-98.4%) | 115                   | 7              | 15             | 152           |
|           |                                            | Event<br>(blocks based on IT and RS)       | 82.2%<br>(75.8-87.3%)                      | 82.2%<br>(76.4-86.8%) | 125                   | 35             | 27             | 162           |
|           |                                            | Patient-time                               | 60.0%<br>(52.6-67.0%)                      | 61.2%<br>(56.4-65.8%) | 24                    | 19             | 16             | 30            |
|           |                                            | Time                                       | 98.7%<br>(92.0-99.8%)                      | 98.1%<br>(84.8-99.8%) | 74                    | 1              | 1              | 52            |
|           |                                            | Day                                        | Event <sup>1</sup><br>(blocks based on RS) | 96.9%<br>(79.0-99.6%) | 96.0%<br>(72.6-99.5%) | 31             | 1              | 1             |
|           | Event <sup>2</sup><br>(blocks based on RS) |                                            | 100%<br>(100-100%)                         | 96.0%<br>(72.6-99.5%) | 32                    | 1              | 0              | 24            |
|           | Event<br>(blocks based on IT and RS)       |                                            | 97.1%<br>(85.1-99.5%)                      | 96.0%<br>(72.6-99.5%) | 33                    | 1              | 1              | 24            |
|           | Patient-time                               |                                            | 96.0%<br>(77.6-99.4%)                      | 95.0%<br>(68.8-99.4%) | 24                    | 1              | 1              | 19            |

| Diagnosis | Time unit | Level | Sensitivity (95% CI) | Specificity (95% CI) | True Positive | False Positive | False Negative | True Negative |
|-----------|-----------|-------|----------------------|----------------------|---------------|----------------|----------------|---------------|
|-----------|-----------|-------|----------------------|----------------------|---------------|----------------|----------------|---------------|

<sup>1</sup> Event-level based on RS: No correction rules applied.

<sup>2</sup> Event-level based on RS: Application of  $\pm 1$  time point tolerance margin at start/end of RS episode and 85%-correction within diseased and disease-free blocks.

322 **Table 1:** Summary of the diagnostic test accuracy per diagnostic level (i.e., per time-level, per event-level, and per patient-time-level) per  
323 time unit (i.e., per minute, per hour, and per day) for the diagnoses ‘Systemic Inflammatory Response Syndrome’ (SIRS), depression, and  
324 epilepsy.

#### 325 4. DISCUSSION

326 Our study shows that two features should be considered when presenting the DTA of an IT in the  
327 case of repeated test application and longitudinal data. These are the estimation level and the time  
328 unit which should always be chosen in accordance with diagnosis-specific characteristics and  
329 possible changes in the number of patient-related observations per cluster. An inappropriate feature  
330 in accordance with a specific research question and related estimand causes an increase in TP and  
331 TN observations. The selected diagnosis-specific choices of the estimation level and time unit show  
332 hereby a clear relation to the number of observations included in the DTA estimation. Because the  
333 time-level includes every single time point, the DTA estimation may be enriched with TP and TN  
334 observations. This is less problematic for the event-level that summarizes time points per diseased  
335 and disease-free block into a single, block-specific label; thus, fewer labels are included in the DTA  
336 estimation. This requires that the blocks are based on the diagnostic status of the RS so that the  
337 length of the blocks is fixed (i.e., not subject to the random variable IT). Moreover, if the time unit  
338 does not reflect well the diagnosis-specific characteristics, the DTA estimates may either have  
339 increased precision when using a small unit (i.e., increase in observations), or be distorted due to  
340 losing information as the unit was too large (e.g., epileptic seizures last only seconds to minutes  
341 which excludes using ‘days’ as time unit). In the last case, possible differences between the tests  
342 resulting in FN or FP labels may be lost. Estimand and statistical approach should be chosen  
343 appropriately so that they account for the longitudinal data format, because each of these features  
344 impacts the DTA estimation<sup>18</sup>. Using a simple approach not accounting for this specific data  
345 structure leads to a considerable overestimation of DTA when compared with what is relevant for  
346 clinical practice.

347

348 DTA can be reported using different levels. However, most studies reported their used analytical  
349 procedures and reporting level<sup>29</sup> rather intransparently; only few provided details on the estimation  
350 level and how it was constructed. For example, Wulff *et al.*<sup>23</sup> used the time-level (time unit: days)  
351 and the patient-time-level to present their CDSS's performance. Bode *et al.*<sup>30</sup> formed blocks that  
352 were labeled and the labels of the individual blocks were included in the DTA estimation (i.e.,  
353 event-level with blocks based on IT and RS). Generally, various estimation levels can be used for  
354 the analysis and reporting of an IT's DTA, but researchers should carefully consider their research  
355 objective(s), related estimand(s), and potential differences of interpretation between the estimation  
356 levels, particularly in the context of longitudinal data. In the evaluation of longitudinal data, the  
357 time-level is always a good technical starting point, since the event-levels and the patient-time-  
358 level are based on the labeling of every time point so that they can be derived from the time-level  
359 DTA estimation. We recommend using the time-level when having a disease with short episodes  
360 (e.g., epileptic seizures), when the IT aims to predict a disease, or if the aim is to assess the IT's  
361 precision. The event-level with blocks based on RS can be used if the aim is to assess the IT's  
362 performance in a clinical setting (i.e., here the focus is on the periods that have correctly or  
363 incorrectly been classified by the IT) without having a constant decision to make (i.e., decision  
364 only required when IT changes its diagnostic status). The event-level with blocks based on IT and  
365 RS and patient-time-level are not suited for usage as discussed in the Methods. We recommend  
366 reporting multiple DTA estimations of a test using various level and time unit combinations while  
367 still considering related differences in interpretation.

368  
369 The time unit, which was used for classifying a patient as either diseased or disease-free, also  
370 influences DTA estimation because it affects the number of labeled observations in the clusters.  
371 Many DTA studies do not provide sufficient information to identify if they used longitudinal data<sup>8</sup>

372 and/or their time unit. Studies that use longitudinal data should report their time unit and how they  
373 account for the inflation of the type I error in DTA estimation<sup>31</sup>, which is caused by having repeated  
374 measures per patient. We identified few studies (e.g.,<sup>8,30,32-37</sup>) that indicated or hinted at their used  
375 time unit. As with the estimation level, the used time unit also influences the interpretation and  
376 understanding of the DTA estimates<sup>31</sup>. In the previously presented examples, we show that the time  
377 unit has a critical implication on the IT's performance; hence, the IT's DTA estimation may be  
378 misleading if the time unit does not represent the disease-specific character (e.g., DTA of epilepsy  
379 reported with time unit 'days'). Using a short time unit has the advantage to increase precision, as  
380 the number of observations per cluster increases<sup>38</sup>. Additionally, we recommend being specific in  
381 the date and time classification of an episode to ensure an adequate evaluation. If, for example,  
382 both tests classify per day (i.e., starting at 00:00 am and finishing at 11:59 pm), then the effect on  
383 the DTA estimation, irrespective of time unit and estimation level, would be that the DTA estimates  
384 are identical. This is caused by equally inflating the number of observations included in the clusters  
385 in comparison to fewer numbers of observations.

386  
387 Characteristics of the diagnosis must be considered even before performing the DTA estimation,  
388 as they determine the required time unit. The estimation level is somewhat unaffected, but  
389 researchers should select a level that best represents the research aim. As shown in the epilepsy  
390 example, the sensitivity and specificity estimates of all three estimation levels using 'days' as time  
391 unit differed barely. Other diseases which are characterized by medium to long episode periods  
392 and medium to long disease-free intervals between episodes, such as SIRS<sup>39</sup> or depression<sup>40-42</sup>,  
393 could theoretically be assessed using any of the three time units. However, using 'minutes' as time  
394 unit significantly increases the number of observations; thus, the evaluation using an estimation  
395 tool could be slower due to the large number of observations, while also being more precise. We



396 suggest to only use a small time unit if the aim is to precisely and correctly assess the times of an  
397 episode start and end. The translation of observed DTA in a clinically meaningful DTA is often  
398 hampered when using small time units as it is inflated when compared to larger time units.

399

#### 400 **4.1 Limitations**

401 All original datasets were collected with a defined study-specific purpose and modified to some  
402 extent (Appendices 4 and 5); thus, they are subject to a certain risk of data-generating pitfalls<sup>43</sup>.  
403 Especially, the depression and epilepsy datasets lacked information on IT and RS diagnoses; hence,  
404 IT and RS diagnoses were produced based on the available information in the datasets.  
405 Incorporation bias is most likely present in both datasets<sup>44</sup>. However, for this study's purpose it  
406 remains un concerning because we aimed to demonstrate the problem in estimating an IT's DTA  
407 using longitudinal data. Note that the simulation of the depression data may likely not reflect a real-  
408 life situation (i.e., we expected a similar behavior of DTA estimates compared to the other  
409 diagnoses).

410 In this study, we assumed that the RSs perfectly diagnosed the diseases. Depending on the clinical  
411 setting, this might not be true, especially in situations where the DT is expected to alert clinicians  
412 before the RS becomes positive. Researchers should also keep in mind that the IT and/or RS can  
413 change over time (e.g., updated guidelines for diagnosis).

414

#### 415 **5. Conclusion**

416 Using longitudinal data in a DTA study requires researchers to consider methodological choices  
417 and a clear pre-defined estimand early in the planning phase. Choices need to be made on the  
418 estimation level and the time unit considering diagnostic-specific characteristics as well as the  
419 related number of observations included in the DTA estimation. When reporting the DTA study's

420 findings, researchers should be transparent and state their rationale for the previously made choices.  
421 Researchers are not limited to reporting only one estimation level and/or time unit. As a next step,  
422 these methodological approaches could be improved by using a nonparametric approach that  
423 incorporates the structured correlation of the time series evaluation as well as other characteristics  
424 of a real-life dataset (e.g., missing values).

425 **LIST OF ABBREVIATIONS**

| <b>Abbreviation</b> | <b>Definition</b>                |
|---------------------|----------------------------------|
| CDSS                | Clinical decision support system |
| CI                  | Confidence interval              |
| DT                  | Diagnostic test                  |
| DTA                 | Diagnostic test accuracy         |
| EEG                 | Electroencephalogram             |
| FN                  | False negative                   |
| FP                  | False positive                   |
| IT                  | Index test                       |
| RS                  | Reference standard               |
| TN                  | True negative                    |
| TP                  | True positive                    |

426

427 **DECLARATIONS**

428 **Ethics approval and consent to participate**

429 For this study, we used only publicly available anonymized datasets. No approval by an  
430 institutional review board or regional review board was required as this study has no direct  
431 implications for their health and wellbeing.

432

433 **Consent for publication**

434 Not applicable.

435

436 **Competing interests**

437 The authors declare that they have no competing interests.

438

439 **Funding**

440 This work was supported by the German Federal Ministry of Health via the ELISE project (grant  
441 number 2520DAT66C) and by the German Research Foundation (DFG; grant number 499188607).

442

443 **Registration and accessibility of the study protocol**

444 This work was neither registered nor did we publish a study protocol because it is a study  
445 demonstrating theoretical approaches with use cases from clinical practice and not a diagnostic test  
446 accuracy study in itself.

447

448 **Availability of data and materials**

449 The original datasets can be accessed via the data owners (see “2.3 The datasets”); the modified-  
450 labeled datasets including the R-Code for the dataset modifications can be accessed via

451 [https://zivgitlab.uni-muenster.de/ruebsame/dta\\_longitudinal\\_data\\_methods](https://zivgitlab.uni-muenster.de/ruebsame/dta_longitudinal_data_methods). All rights of the  
452 modified-labeled datasets remain with the data owners of this publication. The R package  
453 “diagacc” can be accessed via <https://github.com/wbr-p/diagacc>.

454

## 455 **Acknowledgements**

456 We thank Maria Stark (Department of Medical Biometry and Epidemiology, University Medical  
457 Center Hamburg, Hamburg, Germany), Jürgen Wellmann (Institute of Epidemiology and Social  
458 Medicine, University of Münster, Münster, Germany), and Johannes B. Reitsma (Julius Center for  
459 Health Sciences and Primary Care, University Medical Center Utrecht, Utrecht University, Utrecht,  
460 The Netherlands) for their valuable input in understanding and dealing with the challenge of  
461 diagnostic test accuracy estimation when using longitudinal data.

462

## 463 **Authors’ contributions (CRediT Taxonomy)**

464 **Julia Böhnke:** Conceptualization (equal); data curation (equal); formal analysis (lead);  
465 investigation (equal); methodology (lead); project administration (equal); resources (equal);  
466 visualization (lead); writing – original draft preparation (lead); writing - review and editing (lead).

467 **Antonia Zapf:** Conceptualization (equal); data curation (equal); formal analysis (equal);  
468 investigation (equal); methodology (equal); project administration (equal); resources (equal);  
469 supervision (equal); visualization (equal); writing – original draft preparation (equal); writing –

470 review and editing (equal). **Katharina Kramer:** Conceptualization (equal); data curation (equal);  
471 formal analysis (equal); investigation (equal); methodology (equal); project administration (equal);  
472 resources (equal); supervision (equal); visualization (equal); writing – original draft preparation

473 (equal); writing – review and editing (equal). **Philipp Weber:** Writing – analysis program (lead);  
474 Writing – review and editing (equal). **ELISE Study Group:** Writing – review and editing (equal).

475 **André Karch:** Conceptualization (equal); data curation (equal); formal analysis (equal);  
476 investigation (equal); methodology (equal); project administration (equal); resources (equal);  
477 supervision (equal); visualization (equal); writing – original draft preparation (equal); writing –  
478 review and editing (equal). **Nicole Rübsamen:** Conceptualization (equal); data curation (equal);  
479 formal analysis (equal); investigation (equal); methodology (equal); project administration (equal);  
480 resources (equal); supervision (equal); visualization (equal); writing – original draft preparation  
481 (equal); writing – review and editing (equal).

482 **REFERENCES**

- 483 1. Definition of diagnostic test - NCI Dictionary of Cancer Terms - National Cancer Institute.  
484 Accessed March 31, 2022. [https://www.cancer.gov/publications/dictionaries/cancer-](https://www.cancer.gov/publications/dictionaries/cancer-terms/def/diagnostic-test)  
485 [terms/def/diagnostic-test](https://www.cancer.gov/publications/dictionaries/cancer-terms/def/diagnostic-test)
- 486 2. Leeflang MMG, Allerberger F. How to: evaluate a diagnostic test. *Clin Microbiol Infect.*  
487 2019;25(1):54-59. doi:10.1016/J.CMI.2018.06.011
- 488 3. European Parliament and Council of the European Union. *Regulation (EU) 2017/745 of*  
489 *the European Parliament and of the Council of 5 April 2017 on Medical Devices,*  
490 *Amending Directive 2001/83/EC, Regulation (EC) No 178/2002 and Regulation (EC) No*  
491 *1223/2009 and Repealing Council Directives 90/385/EEC and 93/42/EEC.*; 2017:1-175.  
492 Accessed April 5, 2022. [https://eur-lex.europa.eu/legal-](https://eur-lex.europa.eu/legal-content/EN/TXT/?uri=CELEX%3A32017R0745)  
493 [content/EN/TXT/?uri=CELEX%3A32017R0745](https://eur-lex.europa.eu/legal-content/EN/TXT/?uri=CELEX%3A32017R0745)
- 494 4. Hoyer A, Zapf A. Studies for the evaluation of diagnostic tests:part 28 of a series on  
495 evaluation of scientific publications. *Dtsch Arztebl Int.* 2021;118(33-34):550-560.  
496 doi:10.3238/ARZTEBL.M2021.0224
- 497 5. Chassé M, Fergusson DA. Diagnostic Accuracy Studies. *Semin Nucl Med.* 2019;49(2):87-  
498 93. doi:10.1053/J.SEMNUCLMED.2018.11.005
- 499 6. Sitch AJ, Dekkers OM, Scholefield BR, Takwoingi Y. Introduction to diagnostic test  
500 accuracy studies. *Eur J Endocrinol.* 2021;184(2):E5-E9. doi:10.1530/EJE-20-1239
- 501 7. Miller DC, Dunn RL, Wei JT. Assessing the Performance and Validity of Diagnostic Tests  
502 and Screening Programs. *Clin Res Methods Surg.* Published online 2006:157-174.  
503 doi:10.1007/978-1-59745-230-4\_10
- 504 8. Böhnke J, Varghese J, Karch A, et al. Systematic review identifies deficiencies in  
505 reporting of diagnostic test accuracy among clinical decision support systems. *J Clin*

- 506        *Epidemiol.* 2022;151:171-184. doi:10.1016/J.JCLINEPI.2022.08.003
- 507    9.    Ochodo EA, De Haan MC, Reitsma JB, Hooft L, Bossuyt PM, Leeflang MMG.  
508        Overinterpretation and misreporting of diagnostic accuracy studies: evidence of “spin.”  
509        *Radiology.* 2013;267(2):581-588. doi:10.1148/RADIOL.12120527
- 510    10.    Genders TSS, Spronk S, Stijnen T, Steyerberg EW, Lesaffre E, Hunink MGM. Methods  
511        for calculating sensitivity and specificity of clustered data: A tutorial. *Radiology.*  
512        2012;265(3):910-916.  
513        doi:10.1148/RADIOL.12120509/ASSET/IMAGES/LARGE/120509T02.JPEG
- 514    11.    Lange K. *Nichtparametrische Analyse Diagnostischer Gütemaße Bei Clusterdaten*  
515        [Dissertation]. Georg-August-University Göttingen, Germany; 2011.  
516        doi:10.53846/GOEDISS-3538
- 517    12.    Gönen M, Panageas KS, Larson SM. Statistical Issues in Analysis of Diagnostic Imaging  
518        Experiments with Multiple Observations per Patient. *Radiology.* 2001;221(3):763-767.  
519        doi:10.1148/RADIOL.2212010280
- 520    13.    Mondol MH, Rahman MS. Bias-reduced and separation-proof GEE with small or sparse  
521        longitudinal binary data. *Stat Med.* 2019;38(14):2544-2560. doi:10.1002/SIM.8126
- 522    14.    Miao Z, Tang LL, Yuan A. Comparative study of statistical methods for clustered ROC  
523        data: nonparametric methods and multiple outputation methods. *Biostat Epidemiol.*  
524        2021;5(2):169-188. doi:10.1080/24709360.2021.1880224
- 525    15.    European Medicines Agency. *ICH E9 (R1) Addendum on Estimands and Sensitivity*  
526        *Analysis in Clinical Trials to the Guideline on Statistical Principles for Clinical Trials.*;  
527        2020. Accessed January 24, 2023. [https://www.ema.europa.eu/en/documents/scientific-](https://www.ema.europa.eu/en/documents/scientific-guideline/draft-ich-e9-r1-addendum-estimands-sensitivity-analysis-clinical-trials-guideline-statistical_en.pdf)  
528        [guideline/draft-ich-e9-r1-addendum-estimands-sensitivity-analysis-clinical-trials-](https://www.ema.europa.eu/en/documents/scientific-guideline/draft-ich-e9-r1-addendum-estimands-sensitivity-analysis-clinical-trials-guideline-statistical_en.pdf)  
529        [guideline-statistical\\_en.pdf](https://www.ema.europa.eu/en/documents/scientific-guideline/draft-ich-e9-r1-addendum-estimands-sensitivity-analysis-clinical-trials-guideline-statistical_en.pdf)



- 530 16. Lawrance R, Degtyarev E, Griffiths P, et al. What is an estimand & how does it relate to  
531 quantifying the effect of treatment on patient-reported quality of life outcomes in clinical  
532 trials? *J patient-reported outcomes*. 2020;4(1). doi:10.1186/S41687-020-00218-5
- 533 17. Pohl M, Baumann L, Behnisch R, Kirchner M, Krisam J, Sander A. Estimands - A Basic  
534 Element for Clinical Trials: Part 29 of a Series on Evaluation of Scientific Publications.  
535 *Dtsch Arztebl Int*. 2021;118(51-52):883. doi:10.3238/ARZTEBL.M2021.0373
- 536 18. Fierenz A, Rackow B, Zapf A. GMS | 67. Jahrestagung der Deutschen Gesellschaft für  
537 Medizinische Informatik, Biometrie und Epidemiologie e. V. (GMDS), 13. Jahreskongress  
538 der Technologie- und Methodenplattform für die vernetzte medizinische Forschung e. V.  
539 (TMF). In: *The Estimand Framework in Diagnostic Studies*. German Medical Science  
540 GMS Publishing House; 2022. doi:10.3205/22GMDS085
- 541 19. Konietschke F, Brunner E. Nonparametric analysis of clustered data in diagnostic trials:  
542 Estimation problems in small sample sizes. *Comput Stat Data Anal*. 2009;53(3):730-741.  
543 doi:10.1016/J.CSDA.2008.08.006
- 544 20. Bossuyt PM, Reitsma JB, Bruns DE, et al. STARD 2015: an updated list of essential items  
545 for reporting diagnostic accuracy studies. *BMJ*. 2015;351. doi:10.1136/BMJ.H5527
- 546 21. Cui Y, Konietschke F, Harrar SW. The nonparametric Behrens-Fisher problem in partially  
547 complete clustered data. *Biom J*. 2021;63(1):148-167. doi:10.1002/BIMJ.201900310
- 548 22. Lange K, Brunner E. Sensitivity, specificity and ROC-curves in multiple reader diagnostic  
549 trials—A unified, nonparametric approach. *Stat Methodol*. 2012;9(4):490-500.  
550 doi:10.1016/J.STAMET.2011.12.002
- 551 23. Wulff A, Montag S, Rübsamen N, et al. Clinical evaluation of an interoperable clinical  
552 decision-support system for the detection of systemic inflammatory response syndrome in  
553 critically ill children. *BMC Med Inform Decis Mak*. 2021;21(1). doi:10.1186/S12911-021-

- 554 01428-7
- 555 24. Wulff A, Mast M, Bode L, Rathert H, Jack T. Towards an Evolutionary Open Pediatric  
556 Intensive Care Dataset in the ELISE Project. *Stud Health Technol Inform.* 2022;295.  
557 doi:10.3233/SHTI220670
- 558 25. Wulff A, Mast M, Bode L, et al. ELISE - An open pediatric intensive care data set.  
559 Published 2022. Accessed August 25, 2022. [https://leopard.tu-](https://leopard.tu-braunschweig.de/receive/dbbs_mods_00070468)  
560 [braunschweig.de/receive/dbbs\\_mods\\_00070468](https://leopard.tu-braunschweig.de/receive/dbbs_mods_00070468)
- 561 26. Garcia-Ceja E, Riegler M, Jakobsen P, et al. Depresjon: A motor activity database of  
562 depression episodes in unipolar and bipolar patients. *Proc 9th ACM Multimed Syst Conf*  
563 *MMSys 2018*. Published online June 12, 2018:472-477. doi:10.1145/3204949.3208125
- 564 27. Shoeb A. *Application of Machine Learning to Epileptic Seizure Onset Detection and*  
565 *Treatment*. Massachusetts Institute of Technology; 2009. Accessed July 19, 2022.  
566 <https://dspace.mit.edu/handle/1721.1/54669>
- 567 28. R Core Team. R: A Language and Environment for Statistical Computing. Published  
568 online 2021. <https://www.r-project.org/>
- 569 29. Westwood M, Joore M, Grutters J, et al. Contrast-enhanced ultrasound using SonoVue®  
570 (sulphur hexafluoride microbubbles) compared with contrast-enhanced computed  
571 tomography and contrast-enhanced magnetic resonance imaging for the characterisation of  
572 focal liver lesions and detection of liver met. *Health Technol Assess (Rockv)*.  
573 2013;17(16):7-243. doi:10.3310/HTA17160
- 574 30. Bode L, Schamer S, Böhnke J, et al. Tracing the Progression of Sepsis in Critically Ill  
575 Children: Clinical Decision Support for Detection of Hematologic Dysfunction. *Appl Clin*  
576 *Inform.* 2022;13(5). doi:10.1055/A-1950-9637
- 577 31. Parsons NR, Teare MD, Sitch AJ. Unit of analysis issues in laboratory-based research.

- 578 *Elife*. 2018;7. doi:10.7554/ELIFE.32486
- 579 32. Dewan M, Muthu N, Shelov E, et al. Performance of a Clinical Decision Support Tool to  
580 Identify PICU Patients at High Risk for Clinical Deterioration. *Pediatr Crit Care Med*.  
581 2020;21(2):129-135. doi:10.1097/PCC.0000000000002106
- 582 33. Nagori A, Dhingra LS, Bhatnagar A, Lodha R, Sethi T. Predicting Hemodynamic Shock  
583 from Thermal Images using Machine Learning. 2019;9(1):1-9. Accessed May 9, 2022.  
584 <https://pubmed.ncbi.nlm.nih.gov/30643187/>
- 585 34. Calvert JS, Price DA, Chettipally UK, et al. A computational approach to early sepsis  
586 detection. *Comput Biol Med*. 2016;74:69-73. doi:10.1016/J.COMPBIOMED.2016.05.003
- 587 35. Wulff A, Haarbrandt B, Tute E, Marschollek M, Beerbaum P, Jack T. An interoperable  
588 clinical decision-support system for early detection of SIRS in pediatric intensive care  
589 using openEHR. *Artif Intell Med*. 2018;89:10-23. doi:10.1016/J.ARTMED.2018.04.012
- 590 36. Wulff A, Montag S, Steiner B, et al. CADDIE2-evaluation of a clinical decision-support  
591 system for early detection of systemic inflammatory response syndrome in paediatric  
592 intensive care: study protocol for a diagnostic study. *BMJ Open*. 2019;9(6).  
593 doi:10.1136/BMJOPEN-2019-028953
- 594 37. Wulff A, Montag S, RübSamen N, et al. Clinical evaluation of an interoperable clinical  
595 decision-support system for the detection of systemic inflammatory response syndrome in  
596 critically ill children. *BMC Med Inform Decis Mak*. 2021;38(1):219-226.  
597 doi:10.1186/s12911-021-01428-7
- 598 38. Hess AS, Shardell M, Johnson JK, et al. Methods and recommendations for evaluating and  
599 reporting a new diagnostic test. *Eur J Clin Microbiol Infect Dis*. 2012;31(9).  
600 doi:10.1007/S10096-012-1602-1
- 601 39. Chakraborty RK, Burns B. Systemic Inflammatory Response Syndrome. StatPearls.

- 602 Published 2022. Accessed August 17, 2022.
- 603 <https://www.ncbi.nlm.nih.gov/books/NBK547669/>
- 604 40. Chand SP, Arif H. *Depression*. StatPearls Publishing; 2022. Accessed November 15, 2022.
- 605 <https://www.ncbi.nlm.nih.gov/books/NBK430847/>
- 606 41. Goodwin G. Depression. In: Castle D, Coghill D, eds. *Comprehensive Men's Mental*
- 607 *Health*. Cambridge University Press; 2021:128-138. doi:10.1017/9781108646765.013
- 608 42. Strunk DR, Pfeifer BJ, Ezawa ID. Depression. In: Wenzel A, ed. *Handbook of Cognitive*
- 609 *Behavioural Therapy: Applications., Vol. 2*. American Psychological Association; 2021:3-
- 610 31. doi:<http://dx.doi.org/10.1037/0000219-001>
- 611 43. Morris TP, White IR, Crowther MJ. Using simulation studies to evaluate statistical
- 612 methods. *Stat Med*. 2019;38(11):2074-2102. doi:10.1002/SIM.8086
- 613 44. Catalogue of Bias Collaboration. Incorporation bias. In: Plüddemann A, McCall M, eds.
- 614 *Scakett Catalogue of Biases 2019.* ; 2019. Accessed November 21, 2022.
- 615 <https://catalogofbias.org/biases/incorporation-bias/>
- 616

617 **ONLINE SUPPLEMENTARY MATERIALS**

618

619 Appendix 1 Key terminology of diagnostic test accuracy and diagnostic test accuracy studies

620 Appendix 2 Repeated test application in a longitudinal setting

621 Appendix 3 STARD 2015 checklist

622 Appendix 4 Labeling approaches per estimation level

623 Appendix 5 Dataset modifications and results of different labeling and correction approaches

624 Appendix 6 Flow chart per dataset

625 Appendix 7 Demographic characteristics of participants per modified diagnostic dataset
